# Supplementary material
Source: PubMed Central journal article supplement (PMC2777950)
Supplement: cvp246_1.pdf [file cvp246_1.pdf]

## MATERIALS AND METHODS

### Canine Model of Sustained Ventricular Tachyarrhythmia

The model has been previously described in considerable detail.<sup>1-3</sup> Left circumflex coronary artery occlusion (2min) started the last minute of submaximal exercise was used to test animals for ventricular fibrillation (VF) susceptibility. Large defibrillation (Adult Statz-pads; Zoll Medical, Burlington, MA) electrodes were placed across the animal's chest so that electrical defibrillation could be achieved with a minimal delay, but only after the animal was unconscious (10-20 s after VF onset).

Myocardial infarction size was not measured in the present study, inasmuch as the hearts were removed for the *in vitro* studies. However, in previous studies using this canine model of sudden death, the ligation of left anterior coronary artery produced modest myocardial infarction in the dogs shown to be susceptible to VF (17.7 ± 0.9 % of left ventricular mass, n = 93).<sup>3</sup>

### Optical Action Potential (AP) Mapping in the Canine Wedge Preparation

Details of the experimental procedure for optical mapping in the canine wedge preparation are provided elsewhere.<sup>4</sup> Physiological stability of the preparations was insured by monitoring the volume-conducted electrocardiogram, coronary perfusion pressure (50-60 mmHg), coronary flow, and perfusion temperature (35.5 ± 0.5°C) continuously throughout each experiment.

Activation times, repolarization times, and AP duration (APD) were measured directly from all optical APs using previously validated algorithms.<sup>4</sup> APD alternans magnitude was defined as the difference in APD between two consecutive beats<sup>5</sup> during stable alternans. Stimulation rate causing APD alternans in excess of 10 ms was defined as the APD alternans threshold.

### Ca<sup>2+</sup> Imaging in Myocytes

For current-clamp experiments the external solution contained in mM: 140 NaCl, 5.4 KCl, 2.0 CaCl<sub>2</sub>, 0.5 MgCl<sub>2</sub>, 10 HEPES, and 5.6 glucose (pH 7.4). Patch pipettes were filled with a solution that contained in mM: 90 K-aspartate, 50 KCl, 5 MgATP, 5 NaCl, 1 MgCl<sub>2</sub>, 0.1 Tris GTP, 10 HEPES, and 0.1 Fluo-3 K-salt (Molecular Probes, OR) (pH 7.2). For the voltage-clamp experiments the external solution contained in mM: 140 NaCl, 5.4 CsCl, 2.0 CaCl<sub>2</sub>, 0.5 MgCl<sub>2</sub>, 10 HEPES, and 5.6 glucose (pH 7.4). Patch pipettes were filled with a solution that contained in mM: 123 CsCl,

20 TEACl, 5 MgATP, 5 NaCl, 1 MgCl<sub>2</sub>, 0.1 Tris GTP, 10 HEPES, and 0.1 Rhod-2 K-salt (Molecular Probes, OR) or 0.1 Fluo-3 K-salt (pH 7.2).

To record simultaneously intra SR and cytosolic Ca<sup>2+</sup> levels, Fluo-5N and Rhod-2 were excited by 488- and 543-nm laser lines, and fluorescence was acquired at wavelengths of 500–530 and >590 nm, respectively. In these experiments 10 mM 2,3-butanedione monoxime (BDM) was used to prevent movement artifacts.

Ca<sup>2+</sup> currents (I<sub>Ca</sub>) and corresponding Ca<sup>2+</sup> transients were evoked by 300 ms depolarization steps from a holding potential of -50 to 0 mV, unless otherwise stated. Amplitude of Ca<sup>2+</sup> alternans was defined as 100–(A2/A1)\*100 (%), where A1 and A2 are amplitudes of two consecutive cytosolic Ca<sup>2+</sup> transients. Intra-SR Ca<sup>2+</sup> dynamics in Fluo-5N loaded saponin-permeabilized myocytes were studied using an intracellular solution that contained: (mM) 120 K-aspartate, 20 KCl, 3 MgATP, 0.81 MgCl<sub>2</sub>, 10 phosphocreatine, 5 U ml<sup>-1</sup> creatine phosphokinase, 0.5 EGTA (pCa 7) and 20 HEPES (pH 7.2). Kinetics of SR Ca<sup>2+</sup> uptake were measured in the presence 30 μM ruthenium red, a RyR inhibitor.

The temporal dynamics in Fluo-5N fluorescence in permeabilized myocytes were expressed as  $\Delta F_{CAFF}/\Delta F_{MAX} = (F - F_{CAFF}) / (F_{MAX} - F_{CAFF})$ , where F represents fluorescence at time t, F<sub>CAFF</sub> represents the fluorescence level of the cells after the application of 10 mM of caffeine, F<sub>MAX</sub> represents Fluo-5N fluorescence in the presence of 10 mM of [Ca<sup>2+</sup>]. Fluo-5N fluorescence in voltage-clamped myocytes was converted to [Ca<sup>2+</sup>] according to the following equation:  $[Ca^{2+}] = Kd * (F - F_{CAFF}) / (F_{MAX} - F)$ , where Kd was 400 μM.<sup>6</sup> F<sub>MAX</sub> was determined by application of 10 mM of [Ca<sup>2+</sup>] and 0.1% saponin in the presence of 10 mM of BDM.

### Measurements of Reactive Oxygen Species (ROS) Production and Ryanodine Receptor (RyR) Free Thiol Content

To measure ROS production, cells were loaded with 10 μM 5-(and-6) chloromethyl-2',7'-dichlorodihydrofluorescein diacetate (DCFDA) for 30 min at room temperature, followed by 15 min for de-esterification. Loaded cells were excited with the 488 nm line of argon laser and emission was collected at 500-560 nm using Olympus Fluoview 1000 confocal system.

mBB fluorescence in SR samples was measured using EpichemiII Darkroom fluorescence system (UVP

Bioimaging Sys., CA; excitation 365 nm and emission 400-600 nm). Images were acquired and analyzed using LabWorks 4.0 software.

**Reagents.**

All reagents are from Sigma-Aldrich, Inc (MO), unless otherwise indicated.

**RESULTS**

The effects of  $\beta$ -adrenergic agonist Iso on  $I_{Ca}$  and  $Ca^{2+}$  transients were not altered in VF myocytes when

compared to control (Figure S1). In the absence of Iso, average peak  $I_{Ca}$  density was  $-2.9 \pm 0.6$  and  $-3.0 \pm 0.4$  pA/pF in control (n=7) and in VF (n=7) myocytes, respectively. In the presence of 100 nM Iso, the average peak  $I_{Ca}$  density was  $-8.3 \pm 1.0$  (n=9) in control and  $-9.3 \pm 1.0$  pA/pF (n=7) in VF myocytes, respectively. These values are similar to those reported by other groups for canine ventricular myocytes.<sup>7,8</sup> In the absence of Iso, average amplitude of  $Ca^{2+}$  transients was  $1.0 \pm 0.2$  and  $0.9 \pm 0.1$  ( $\Delta F/F_0$ ) in control (n=7) and VF (n=7) myocytes, respectively. In the presence of Iso, average amplitude of  $Ca^{2+}$  transients was  $2.8 \pm 0.3$  and  $2.9 \pm 0.3$  ( $\Delta F/F_0$ ) in control (n=9) and VF (n=7) myocytes, respectively.

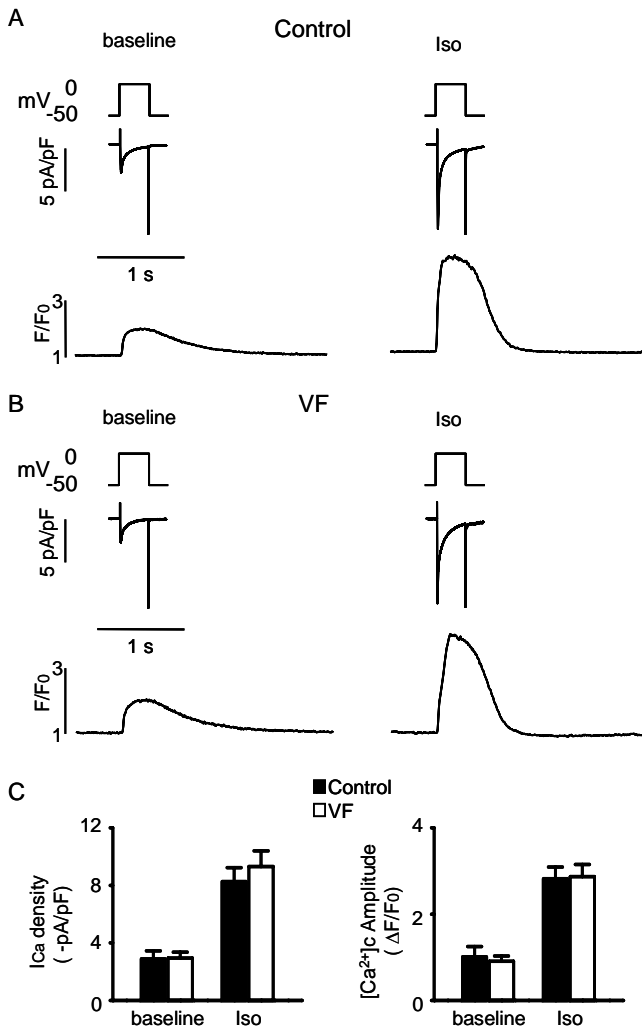

**Figure S1.** Isoproterenol (Iso) produced similar effects on  $I_{Ca}$  and  $Ca^{2+}$  transients in control and VF myocytes. Representative  $I_{Ca}$  and corresponding temporal profiles of Fluo-3 fluorescence recorded in control (A) and in VF (B) myocytes before and during application of 100 nM Iso. Upper traces show voltage protocol used. C, Average values of the peak  $I_{Ca}$  density and amplitude of  $Ca^{2+}$  transients recorded in the absence and presence of 100 nM Iso in control and VF myocytes, respectively.

| Parameter                | Control (n=7)  | VF (n=8)        |
|--------------------------|----------------|-----------------|
| $I_{Ca}$ density (pA/pF) | $-9.3 \pm 1.1$ | $-9.0 \pm 1.2$  |
| $\tau_1$ (ms)            | $13.0 \pm 0.9$ | $13.8 \pm 2.2$  |
| $\tau_2$ (ms)            | $72.8 \pm 2.6$ | $90.3 \pm 14.0$ |

**Online Table I.** Parameters of  $I_{Ca}$  recorded at 0 mV as described in Figure 3 of the main manuscript.  $\tau_1$  and  $\tau_2$  are time constants of exponential fit of the decay of  $I_{Ca}$

As shown in online Table I, the amplitude and decay of  $I_{Ca}$  evoked by 300 ms step depolarization from -50 to 0 mV, were not different in control and VF myocytes.

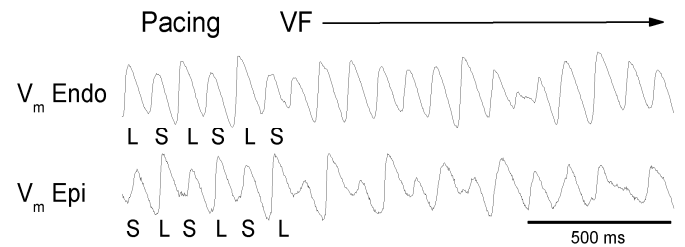

**Figure S2.** Spatially discordant alternans preceding the induction of ventricular fibrillation (VF) in a left ventricular wedge preparation from a VF canine. Shown are action potential traces from the endocardium (Endo) and epicardium (Epi) during pacing induced alternans and the initiation of VF. Note that preceding VF, the short-long pattern of action potential duration alternans at the Endo (LSLSLS) is spatially out-of-phase with that from the Epi (SLSLSL).

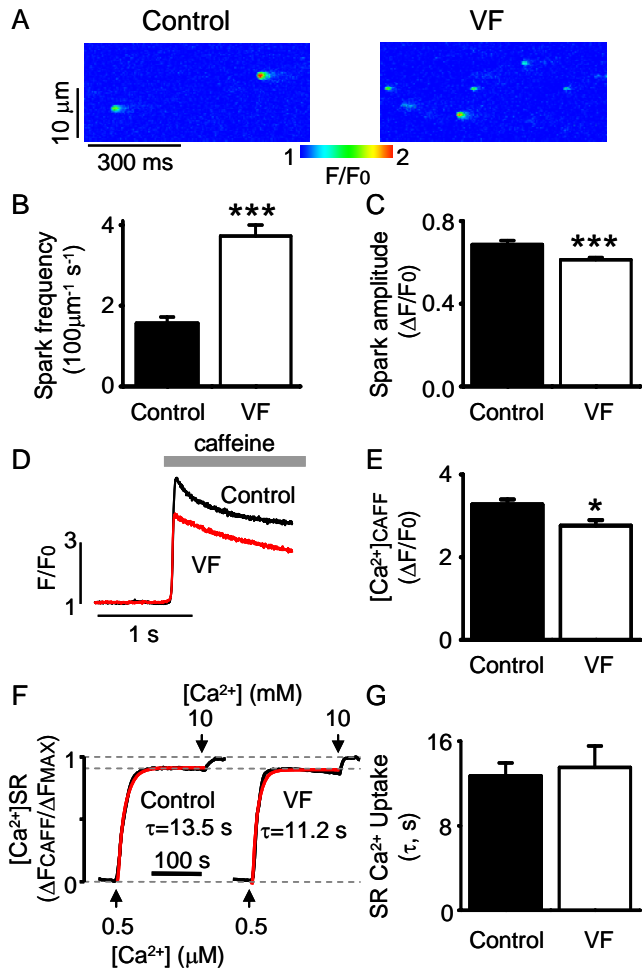

**Figure S3.** VF myocytes display increased diastolic SR  $\text{Ca}^{2+}$  leak and conserved SERCA function. **A**, Representative line-scan images of  $\text{Ca}^{2+}$  sparks in control and VF cells. **B**, Average values of spark frequency were  $1.57 \pm 0.16$  ( $n=52$ ) and  $3.72 \pm 0.27$  ( $n=41$ ,  $100 \mu\text{m}^{-1} \text{s}^{-1}$ ) in control and VF cells, respectively. \*\*\* $P < 0.001$ , vs. control. **C**, Average amplitudes of  $\text{Ca}^{2+}$  sparks were  $0.69 \pm 0.02$  ( $n=212$ ) and  $0.61 \pm 0.01$  ( $n=412$ ,  $\Delta F/F_0$ ) in control and VF cells, respectively. \*\*\* $P < 0.001$ , vs. control. **D**, Temporal profiles of line-scan images of caffeine-induced  $\text{Ca}^{2+}$  transients in control and VF cells. **E**, Average amplitudes of caffeine-induced  $\text{Ca}^{2+}$  transients ( $[\text{Ca}^{2+}]_{\text{CAFF}}$ ) were  $3.27 \pm 0.12$  ( $n=11$ ) and  $2.76 \pm 0.14$  ( $n=12$ ,  $\Delta F/F_0$ ) in control and VF cells, respectively. \* $P < 0.05$ , vs. control. **F**, Time course of SR  $\text{Ca}^{2+}$  uptake in permeabilized control and VF myocytes, measured with Fluo-5N-loaded SR in the presence of  $30 \mu\text{M}$  ruthenium red. The SR  $\text{Ca}^{2+}$  uptake was initiated by the addition of  $0.5 \mu\text{M}$  of  $\text{Ca}^{2+}$ . **G**, Average time constants (from exponential fit) of SR  $\text{Ca}^{2+}$  uptake were  $12.7 \pm 1.2$  s in control ( $n=10$ ) and  $13.5 \pm 2.0$  s in VF myocytes ( $n=9$ ).

Figure S2 demonstrates an example of APD alternans preceding VF observed in a wedge preparation from a VF susceptible dog.

Figure S3 shows that permeabilized VF myocytes display increased  $\text{Ca}^{2+}$  sparks frequency (panels A and B), decreased SR  $\text{Ca}^{2+}$  load (panels D and E) and conserved SERCA function (panels F and G). NCX activity was assessed by measuring the rate of decay of caffeine-induced  $\text{Ca}^{2+}$  transients in control and VF voltage-clamped myocytes. As demonstrated in Figure S4, the rate of decay of caffeine-induced  $\text{Ca}^{2+}$  transients was not different between control and VF myocytes.

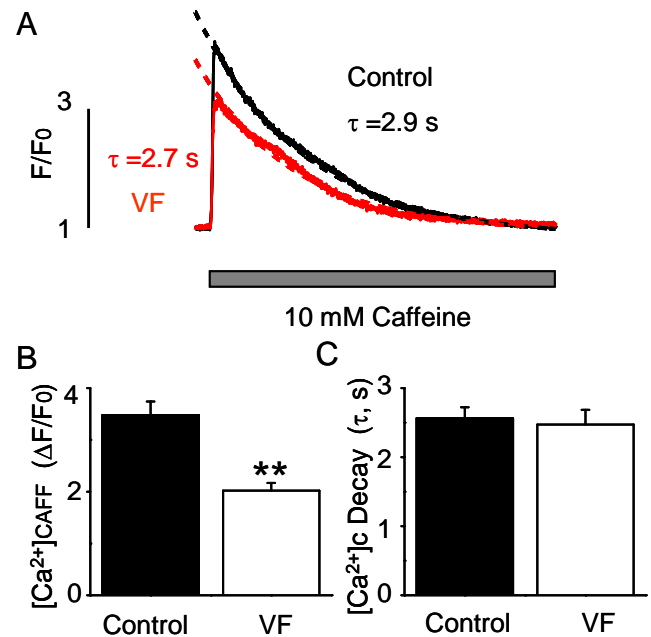

**Figure S4.** The rate of cytosolic  $\text{Ca}^{2+}$  removal by NCX is not altered in VF myocytes. **(A)** Representative recordings of  $\text{Ca}^{2+}$  transients induced by rapid application of 10 mM caffeine in control and VF myocytes. **(B)** Average amplitudes ( $\Delta F/F_0$ ) of caffeine-induced  $\text{Ca}^{2+}$  transients were  $3.5 \pm 0.3$  ( $n=7$ ) in control and  $2.0 \pm 0.2$  ( $n=7$ ) in VF myocytes, respectively. **(C)** The decay time constants of the caffeine-induced  $\text{Ca}^{2+}$  transients in control ( $n=6$ ) and HF ( $n=6$ ) myocytes were  $2.6 \pm 0.2$  and  $2.5 \pm 0.2$  s, respectively. (\*\* $P < 0.01$ ).

## REFERENCES

1. Billman GE, Schwartz PJ, Stone HL. Baroreceptor reflex control of heart rate: a predictor of sudden cardiac death. *Circulation* 1982;66:874-880.

2. Schwartz PJ, Billman GE, Stone HL. Autonomic mechanisms in ventricular fibrillation induced by myocardial ischemia during exercise in dogs with healed myocardial infarction. An experimental preparation for sudden cardiac death. *Circulation* 1984;**69**:790-800.
3. Billman GE. A comprehensive review and analysis of 25 years of data from an in vivo canine model of sudden cardiac death: implications for future anti-arrhythmic drug development. *Pharmacol Ther* 2006;**111**:808-835.
4. Akar FG, Rosenbaum DS. Transmural electrophysiological heterogeneities underlying arrhythmogenesis in heart failure. *Circ Res* 2003;**93**:638-645.
5. Pruvot EJ, Katra RP, Rosenbaum DS, Laurita KR. Role of calcium cycling versus restitution in the mechanism of repolarization alternans. *Circ Res* 2004;**94**:1083-1090.
6. Shannon TR, Guo T, Bers DM. Ca<sup>2+</sup> scraps: local depletions of free [Ca<sup>2+</sup>] in cardiac sarcoplasmic reticulum during contractions leave substantial Ca<sup>2+</sup> reserve. *Circ Res* 2003;**93**:40-45.
7. Song LS, Pi Y, Kim SJ, Yatani A, Guatimosim S, Kudej RK *et al.* Paradoxical cellular Ca<sup>2+</sup> signaling in severe but compensated canine left ventricular hypertrophy. *Circ Res* 2005;**97**:457-464.
8. Yatani A, Shen YT, Yan L, Chen W, Kim SJ, Sano K *et al.* Down regulation of the L-type Ca<sup>2+</sup> channel, GRK2, and phosphorylated phospholamban: protective mechanisms for the denervated failing heart. *J Mol Cell Cardiol* 2006;**40**:619-628.
